# Supplementary material
Source: HighWire-hosted journal article supplement (https://www.annfammed.org/highwire/filestream/26617/field_highwire_adjunct_files/0/Hall_Visual_abstract.pdf)
Supplement: Hall_Visual_abstract.pdf [file Hall_Visual_abstract.pdf]

# Evaluation of a Program to Support Medication for Opioid Use Disorder in Primary Care Practices

Results from an intervention to increase clinic capacity for offering medication for opioid use disorder (MOUD) in 15 Colorado primary care practices

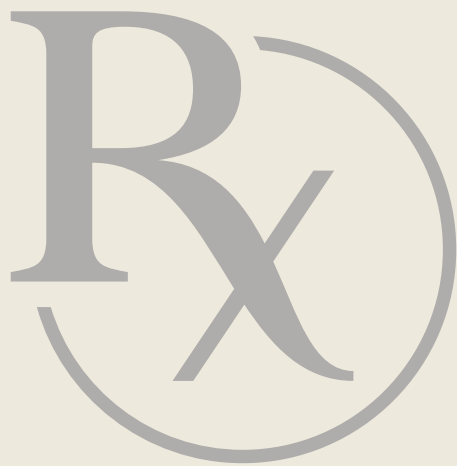

The mean number of active buprenorphine prescriptions per clinic increased from 2.1 in the 3 months preceding the intervention (baseline) to 11.3 at 13 months ( $P < .001$ ).

## Clinic Completion Rates for MOUD Implementation Milestones

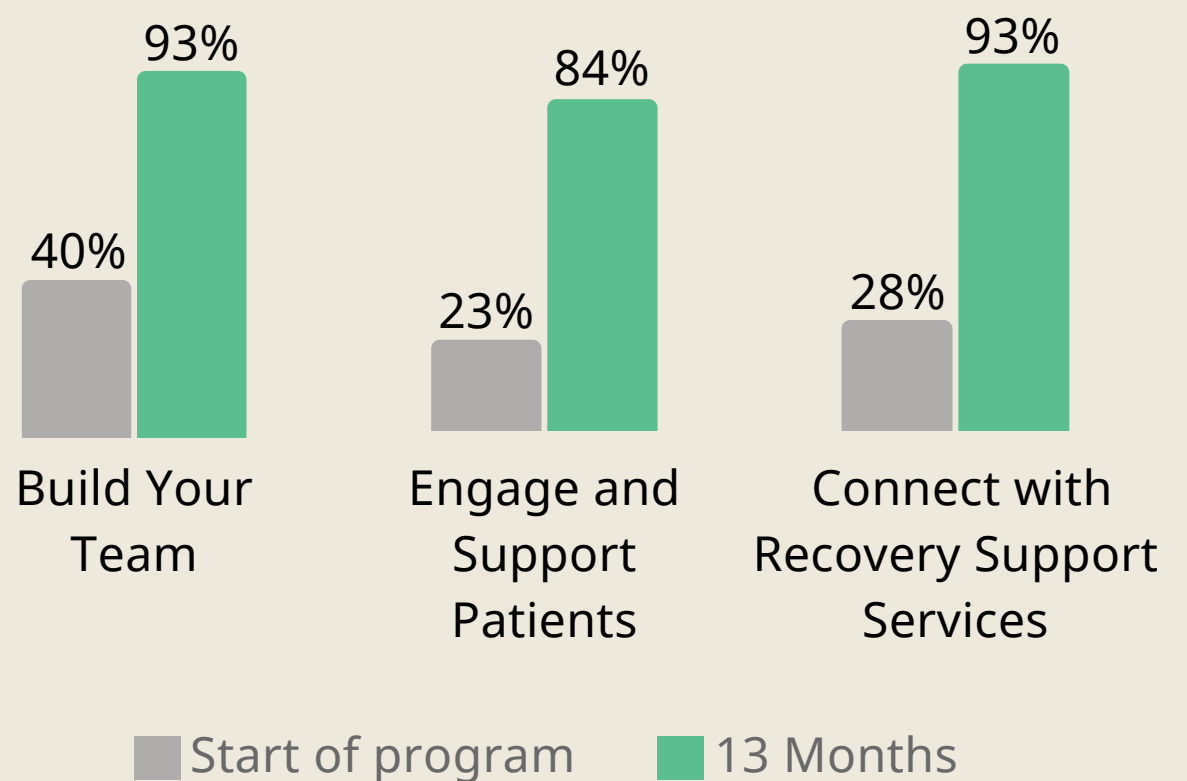

**Source:** Hall TL, Mendez D, Sobczak C, et al. Evaluation of a program designed to support implementation of prescribing medication for treatment of opioid use disorder in primary care practices. *Ann Fam Med*. 2025;23:10.1370/afm.3190
